# Supplementary material for: Full-Thickness Skin Burn Caused by Radiofrequency Ablation of a Benign Thyroid Nodule
Source: PubMed Central journal article supplement — Thyroid. 2016 Jan 1;26(1):183–4. doi: 10.1089/thy.2015.0453 (PMC4742967; doi:10.1089/thy.2015.0453), 2016-01-01
Supplement: Supp_Figure1.pdf [file Supp_Figure1.pdf]

## Supplementary Data

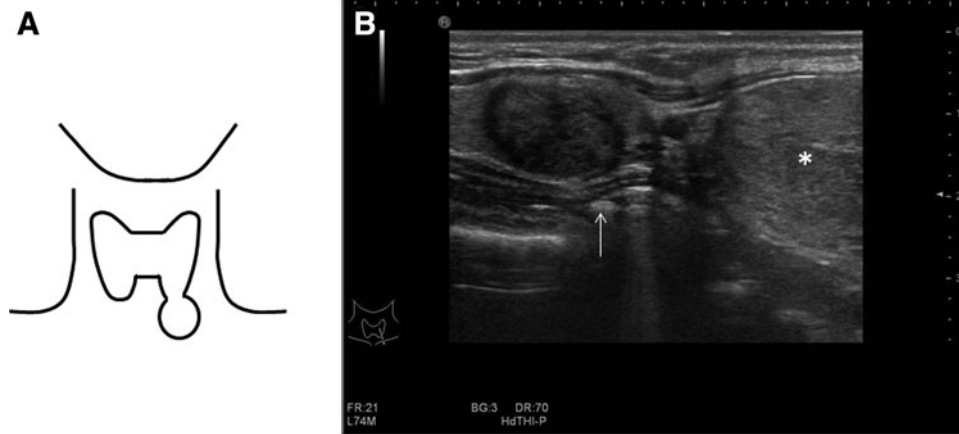

**SUPPLEMENTARY FIG. S1.** (A) Schematic representation of the position of the nodule. (B) Longitudinal B-mode ultrasound (US) image showing the left inferior pole of the thyroid (white arrow) with a small (Thy2) nodule next to a symptomatic (Thy2) nodule attached to it and partly plunging (asterisk).
